# Supplementary material
Source: publisher figshare collection journal article supplement (https://diabetesjournals.figshare.com/ndownloader/files/22395333)
Supplement: Supplementary file 1 [file 22395333]

## Sheet: Epitope Tables 
Supplementary Table 1 - CD8+ T cell epitopes in type 1 diabetes
Antigen	Position	Sequence	IEDB #1	MHC	Human islets, pLNs		Human blood, spleen		HLA-Tg mouse4	NPP5	Ex vivo type 1	Evidence	Refs7	Corresponding author	Reporting
(Gene)					Ex vivo2	Other3	Ex vivo2	Other3			diabetes > controls6				articles
CHGA	*10-19	LLCAGQVTAL	880821	A*02:01			ELISpot				n/a	D+	25958206	Wang L, Zhang M	1
(CHGA)	*43-52	TLSKPSPMPV	884674	A*02:01			ELISpot				n/a	D+	25958206	Wang L, Zhang M	1
	*344-352	KMDQLAKEL	952211	A*02:01			Mmr			MS	n/a	B+	30078552	Mallone R	1
GAD65	*3-11	SPGSGFWSF	177987	B*07:02			ELISpot		DNA-imm	DNA-mouse	no	B+	22997432	Mallone R	1
(GAD2)	*100-108	ACDGERPTL	177585	B*07:02			ELISpot		DNA-imm	DNA-mouse	no	B+	22997432	Mallone R	1
	110-118	FLQDVMNIL	102433	A*02:01			ELISpot		DNA-imm	DNA-mouse	n/a	B+	17513797	Blancou P, Bach JM
	110-118	FLQDVMNIL	102433	A*02:01					Spont		n/a	D-	18390725	van Endert P
	*110-118	FLQDVMNIL	102433	A*02:01			ELISpot		DNA-imm; spont	DNA-mouse	n/a	B+	17513797, 18390725		2
	114-122	VMNILLQYV	104336	A*02:01			Mmr				yes	D+	17947651	Bonifacio E
	114-122	VMNILLQYV	104336	A*02:01				Line			n/a	C-	20029631	Fierabracci A
	114-122	VMNILLQYV	104336	A*02:01			ELISpot; Mmr				n/a	D+	22069251	Mallone R, Wong FS, multicenter
	114-122	VMNILLQYV	104336	A*02:01				Clone			n/a	C-	25112375	Peakman M
	114-122	VMNILLQYV	104336	A*02:01			Mmr				no	D+	29429978	Mallone R
	*114-122	VMNILLQYV	104336	A*02:01			Mmr; ELISpot	Line; clone			yes/no	C-	17947651, 20029631, 22069251, 25112375, 29429978		5
	114-123	VMNILLQYVV	102908	A2				Line		APC	n/a	A-	7722468	Panina-Bordignon P
	114-123	VMNILLQYVV	102908	A*02:01			ELISpot				n/a	D+	17327428	Mallone R, van Endert P
	114-123	VMNILLQYVV	102908	A*02:01			ELISpot		DNA-imm	DNA-mouse	n/a	B+	17513797	Blancou P, Bach JM
	114-123	VMNILLQYVV	102908	A*02:01			ELISpot				n/a	D+	18305140	Mallone R, van Endert P
	114-123	VMNILLQYVV	102908	A*02:01					Spont		n/a	D-	18390725	van Endert P
	114-123	VMNILLQYVV	102908	A*02:01			Mmr				n/a	D+	19837003	Herold KC
	114-123	VMNILLQYVV	102908	A2			Mmr				yes	D+	20357361	Roep BO
	114-123	VMNILLQYVV	102908	A*02:01	Mmr						n/a	C	22213807	von Herrath MG
	114-123	VMNILLQYVV	102908	A2			Mmr				n/a	D+	23803704	Steinman L, Robinson WH
	114-123	VMNILLQYVV	102908	A*02:01				Clone		APC	n/a	A-	25112375	Peakman M
	114-123	VMNILLQYVV	102908	A*02:01			Mmr				no	D+	25249579	Skowera A
	114-123	VMNILLQYVV	102908	A*02:01			Mmr				n/a	D+	25992863	Davis MM
	114-123	VMNILLQYVV	102908	A*02:01			Mmr				yes	D+	29196783	James EA, multicenter
	114-123	VMNILLQYVV	102908	A*02:01			Mmr				n/a	D+	29506985	Monti P
	114-123	VMNILLQYVV	102908	A*02:01				Line			n/a	C-	30008714	Sewell AK
	114-123	VMNILLQYVV	102908	A*02:01			Mmr				n/a	D+	30428974	James EA
	*114-123	VMNILLQYVV	102908	A*02:01	Mmr		Mmr; ELISpot	Line; clone	DNA-imm; spont	DNA-mouse; APC	yes/no	A+	7722468, 17327428, 17513797, 18305140, 18390725, 19837003, 20357361, 22213807, 23803704, 25112375, 25249579, 25992863, 29196783, 29506985, 30008714, 30428974		16
	141-149	LLQEYNWEL	102620	A*02:01			ELISpot		DNA-imm	DNA-mouse	n/a	B+	17513797	Blancou P, Bach JM
	141-149	LLQEYNWEL	102620	A*02:01					Spont		n/a	D-	18390725	van Endert P
	*141-149	LLQEYNWEL	102620	A*02:01			ELISpot		DNA-imm; spont	DNA-mouse	n/a	B+	17513797, 18390725		2
	*159-167	ILMHCQTTL	104844	A*02:01			ELISpot		DNA-imm	DNA-mouse	n/a	B+	17513797	Blancou P, Bach JM	1
	*175-184	HPRYFNQLST	177734	B*07:02			ELISpot		DNA-imm	DNA-mouse	no	B+	22997432	Mallone R	1
	*255-263	RFKMFPEVK	104218	A3				Clone			n/a	C-	10439311	Ou D	1
	*255-263	RFKMFPEVK	104218	A11				Clone			n/a	C-	10439311	Ou D	1
	*269-277	ALP(R→Cit)LIAFT	436368	A2				Line			n/a	C-	26370701	James EA	1
	*277-285	TSEHSHFSL	104317	B15				Clone			n/a	C-	10439311	Ou D	1
	*277-285	TSEHSHFSL	104317	B35				Clone			n/a	C-	10439311	Ou D	1
	*311-320	IPSDLERRIL	177779	B*07:02			ELISpot; Mmr		DNA-imm	DNA-mouse	yes	B+	22997432	Mallone R	1
	*476-484	ELAEYLYNI	104767	A*02:01			ELISpot		DNA-imm	DNA-mouse	n/a	B+	17513797	Blancou P, Bach JM	1
	*498-506	KPQHTNVCF	177813	B*07:02			ELISpot		DNA-imm	DNA-mouse	no	B+	22997432	Mallone R	1
	*530-538	APVIKARMM	177606	B*07:02			ELISpot; Mmr		DNA-imm	DNA-mouse	yes	B+	22997432	Mallone R	1
	536-545	RMMEYGTTMV	102769	A*02:01			ELISpot		DNA-imm	DNA-mouse	n/a	B+	17513797	Blancou P, Bach JM
	536-545	RMMEYGTTMV	102769	A*02:01			ELISpot				n/a	D+	18305140	Mallone R, van Endert P
	536-545	RMMEYGTTMV	102769	A*02:01					Spont		n/a	D-	18390725	van Endert P
	536-545	RMMEYGTTMV	102769	A*02:01			ELISpot; Mmr				n/a	D+	22069251	Mallone R, Wong FS, multicenter
	536-545	RMMEYGTTMV	102769	A*02:01			Mmr				n/a	D+	25992863	Davis MM
	*536-545	RMMEYGTTMV	102769	A*02:01			ELISpot; Mmr		DNA-imm; spont	DNA-mouse	n/a	B+	17513797, 18305140, 18390725, 22069251, 25992863		5
GFAP	*143-151	NLAQDLATV	115871	A*02:01			ELISpot				no	D+	17065343	Standifer NE	1
(GFAP)	*192-200	SLEEEIRFL	115968	A*02:01			ELISpot				no	D+	17065343	Standifer NE	1
	*214-222	QLARQQVHV	115919	A*02:01			ELISpot				no	D+	17065343	Standifer NE	1
IA-2	172-180	SLSPLQAEL	101245	A*02:01			ELISpot				n/a	D+	17065344	Tan R
(PTPRN)	172-180	SLSPLQAEL	101245	A*02:01			ELISpot				n/a	D+	22260783	Yang T
	*172-180	SLSPLQAEL	101245	A*02:01			ELISpot				n/a	D+	17065344, 22260783		2
	*180-188	LLPPLLEHL	101026	A*02:01			ELISpot				n/a	D+	17065344	Tan R	1
	*482-490	SLAAGVKLL	101237	A*02:01			ELISpot				n/a	D+	17065344	Tan R	1
	790-798	TIADFWQMV	102844	A*02:01			ELISpot		DNA-imm	DNA-mouse	n/a	B+	17513797	Blancou P, Bach JM
	790-798	TIADFWQMV	102844	A*02:01					Spont		n/a	D-	18390725	van Endert P
	*790-798	TIADFWQMV	102844	A*02:01			ELISpot		DNA-imm; spont	DNA-mouse	n/a	B+	17513797, 18390725		2
	797-805	MVWESGCTV	140054	A2				Line			n/a	C-	11358432	Harrison LC
	797-805	MVWESGCTV	140054	A2			Mmr				yes	D+	20357361	Roep BO
	797-805	MVWESGCTV	140054	A*02:01	Mmr						n/a	C	22213807	von Herrath MG
	797-805	MVWESGCTV	140054	A2			Mmr				n/a	D+	23803704	Steinman L, Robinson WH
	797-805	MVWESGCTV	140054	A*02:01			Mmr				no	D+	25249579	Skowera A
	797-805	MVWESGCTV	140054	A*02:01			Mmr				n/a	D+	28794283	Peakman M
	797-805	MVWESGCTV	140054	A*02:01			Mmr				no	D+	29196783	James EA, multicenter
	797-805	MVWESGCTV	140054	A*02:01			Mmr				n/a	D+	30428974	James EA
	*797-805	MVWESGCTV	140054	A*02:01	Mmr		Mmr	Line			yes/no	C+	11358432, 20357361, 22213807, 23803704, 25249579, 28794283, 29196783, 30428974		8
	805-813	VIVMLTPLV	102899	A*02:01			ELISpot		DNA-imm	DNA-mouse	n/a	B+	17513797	Blancou P, Bach JM
	805-813	VIVMLTPLV	102899	A*02:01			ELISpot				n/a	D+	18305140	Mallone R, van Endert P
	805-813	VIVMLTPLV	102899	A*02:01					Spont		n/a	D-	18390725	van Endert P
	805-813	VIVMLTPLV	102899	A*02:01			Mmr				n/a	D+	25992863	Davis MM
	805-813	VIVMLTPLV	102899	A*02:01			Mmr				no	D+	29429978	Mallone R
	*805-813	VIVMLTPLV	102899	A*02:01			ELISpot; Mmr		DNA-imm; spont	DNA-mouse	no	B+	17513797, 18305140, 18390725, 25992863, 29429978		5
	830-839	SLYHVYEVNL	102811	A*02:01			ELISpot		DNA-imm	DNA-mouse	n/a	B+	17513797	Blancou P, Bach JM
	830-839	SLYHVYEVNL	102811	A*02:01					Spont		n/a	D-	18390725	van Endert P
	*830-839	SLYHVYEVNL	102811	A*02:01			ELISpot		DNA-imm; spont	DNA-mouse	n/a	B+	17513797, 18390725		2
	*925-933	VLN(R→Cit)MAKGV	441419	A2				Line			n/a	C-	26370701	James EA	1
	962-970	ALTAVAEEV	102306	A*02:01			ELISpot		DNA-imm	DNA-mouse	n/a	B+	17513797	Blancou P, Bach JM
	962-970	ALTAVAEEV	102306	A*02:01					Spont		n/a	D-	18390725	van Endert P
	*962-970	ALTAVAEEV	102306	A*02:01			ELISpot		DNA-imm; spont	DNA-mouse	n/a	B+	17513797, 18390725		2
IAPP	5-13	KLQVFLIVL	100981	A*02:01			ELISpot				yes	D+	14578281	Tan R, Verchere CB
(IAPP)	5-13	KLQVFLIVL	100981	A*02:01			ELISpot				no	D+	17065343	Standifer NE
	5-13	KLQVFLIVL	100981	A*02:01			ELISpot				n/a	D+	17065344	Tan R
	5-13	KLQVFLIVL	100981	A2			Mmr				yes	D+	20357361	Roep BO
	5-13	KLQVFLIVL	100981	A*02:01	Mmr						n/a	C	22213807	von Herrath MG
	5-13	KLQVFLIVL	100981	A2			Mmr				n/a	D+	23803704	Steinman L, Robinson WH
	5-13	KLQVFLIVL	100981	A*02:01			Mmr				no	D+	29196783	James EA, multicenter
	*5-13	KLQVFLIVL	100981	A*02:01	Mmr		ELISpot; Mmr				yes/no	C	14578281, 17065343, 17065344, 20357361, 22213807, 23803704, 29196783		7
	9-17	FLIVLSVAL	100844	A*02:01			ELISpot				no	D+	17065343	Standifer NE
	9-17	FLIVLSVAL	100844	A*02:01			ELISpot				n/a	D+	17065344	Tan R
	*9-17	FLIVLSVAL	100844	A*02:01			ELISpot				no	D+	17065343, 17065344		2
IGRP	152-160	FLWSVFWLI	105191	A*02:01			ELISpot				no	D+	17065343	Standifer NE
(G6PC2)	152-160	FLWSVFWLI	105191	A*02:01			ELISpot				n/a	D+	17065344	Tan R
	152-160	FLWSVFWLI	105191	A*02:01			ELISpot				n/a	D+	22260783	Yang T
	*152-160	FLWSVFWLI	105191	A*02:01			ELISpot				no	D+	17065343, 17065344, 22260783		3
	*211-219	NLFLFLFAV	105409	A2			ELISpot				no	D+	18358785	DiLorenzo TP	1
	215-223	FLFAVGFYL	100843	A*02:01			ELISpot				no	D+	17065343	Standifer NE
	215-223	FLFAVGFYL	100843	A*02:01			ELISpot				n/a	D+	17065344	Tan R
	215-223	FLFAVGFYL	100843	A2			ELISpot				yes	D+	18358785	DiLorenzo TP
	215-223	FLFAVGFYL	100843	A*02:01			ELISpot				n/a	D+	22260783	Yang T
	215-223	FLFAVGFYL	100843	A*02:01			ELISpot		Pept-imm		n/a	D+	28887632	Yang T
	*215-223	FLFAVGFYL	100843	A*02:01			ELISpot		Pept-imm		yes/no	D+	17065343, 17065344, 18358785, 22260783, 28887632		5
	*222-230	YLLLRVLNI	105617	A2			ELISpot				yes	D+	18358785	DiLorenzo TP	1
	228-236	LNIDLLWSV	103368	A*02:01			ELISpot				n/a	D+	17327428	Mallone R, van Endert P
	228-236	LNIDLLWSV	103368	A*02:01			ELISpot				n/a	D+	18305140	Mallone R, van Endert P
	228-236	LNIDLLWSV	103368	A*02:01			Mmr				n/a	D+	19837003	Herold KC
	228-236	LNIDLLWSV	103368	A2			Mmr				n/a	D+	21799852	Faustman DL
	*228-236	LNIDLLWSV	103368	A*02:01			ELISpot; Mmr				n/a	D+	17327428, 18305140, 19837003, 21799852		4
	*258-266	GLV(RàCit)NLGVL	437684	A2				Line			n/a	C-	26370701	James EA	1
	265-273	VLFGLGFAI	103705	A*02:01					Spont		n/a	D-	16493087	Serreze DV, DiLorenzo TP
	265-273	VLFGLGFAI	103705	A*02:01			ELISpot				n/a	D+	17327428	Mallone R, van Endert P
	265-273	VLFGLGFAI	103705	A*02:01			Mmr	Clone			n/a	C-	17376840	Roep BO
	265-273	VLFGLGFAI	103705	A*02:01			ELISpot				n/a	D+	18305140	Mallone R, van Endert P
	265-273	VLFGLGFAI	103705	A2			ELISpot				no	D+	18358785	DiLorenzo TP
	265-273	VLFGLGFAI	103705	A2			Mmr				yes	D+	20357361	Roep BO
	265-273	VLFGLGFAI	103705	A*02:01	Mmr						n/a	C	22213807	von Herrath MG
	265-273	VLFGLGFAI	103705	A2			Mmr				n/a	D+	23803704	Steinman L, Robinson WH
	265-273	VLFGLGFAI	103705	A*02:01			Mmr				no	D+	25249579	Skowera A
	265-273	VLFGLGFAI	103705	A*02:01				TCR			n/a	C-	25302633	DiLorenzo TP
	265-273	VLFGLGFAI	103705	A*02:01			ELISpot				no	D+	25728493	Bonifacio E
	265-273	VLFGLGFAI	103705	A*02:01			ELISpot				n/a	D+	25958206	Wang L, Zhang M
	265-273	VLFGLGFAI	103705	A*02:01			Mmr	Clone			no	C-	28300170	Bonifacio E
	265-273	VLFGLGFAI	103705	A*02:01			Mmr				no	D+	29196783	James EA, multicenter
	265-273	VLFGLGFAI	103705	A*02:01			Mmr				no	D+	29429978	Mallone R
	265-273	VLFGLGFAI	103705	A*02:01			Mmr				n/a	D+	29506985	Monti P
	265-273	VLFGLGFAI	103705	A*02:01				Line			n/a	C-	30008714	Sewell AK
	265-273	VLFGLGFAI	103705	A*02:01			Mmr				n/a	D+	30428974	James EA
	*265-273	VLFGLGFAI	103705	A*02:01	Mmr		ELISpot; Mmr	TCR; clone; line	Spont		yes/no	C+	16493087, 17327428, 17376840, 18305140, 18358785, 20357361, 22213807, 23803704, 25249579, 25302633, 25728493, 25958206, 28300170, 29196783, 29429978, 29506985, 30008714, 30428974		18
	293-301	RLLCALTSL	101199	A*02:01			ELISpot				no	D+	17065343	Standifer NE
	293-301	RLLCALTSL	101199	A*02:01			ELISpot		Pept-imm		n/a	D+	28887632	Yang T
	*293-301	RLLCALTSL	101199	A*02:01			ELISpot		Pept-imm		no	D+	17065343, 28887632		2
INS	2-10 (L2-10)	ALWMRLLPL	100725	A*02:01			ELISpot				n/a	D+	17065344	Tan R
(INS)	2-10 (L2-10)	ALWMRLLPL	100725	A*02:01			ELISpot				n/a	D+	17327428	Mallone R, van Endert P
	2-10 (L2-10)	ALWMRLLPL	100725	A*02:01			ELISpot				n/a	D+	18305140	Mallone R, van Endert P
	2-10 (L2-10)	ALWMRLLPL	100725	A*02:01			Mmr				n/a	D+	19837003	Herold KC
	2-10 (L2-10)	ALWMRLLPL	100725	A*02:01			ELISpot				n/a	D+	22260783	Yang T
	2-10 (L2-10)	ALWMRLLPL	100725	A*02:01			Mmr				yes	D+	25992863	Davis MM
	*2-10 (L2-10)	ALWMRLLPL	100725	A*02:01			ELISpot; Mmr				yes	D+	17065344, 17327428, 18305140, 19837003, 22260783, 25992863		6
	2-11 (L2-11)	ALWMRLLPLL	105674	A2			ELISpot		Pept-imm; clone	APC; proteasome	yes	A-	19011169	Boitard C
	2-11 (L2-11)	ALWMRLLPLL	105674	A*02:01			Mmr				no	D+	21998398	Boitard C
	2-11 (L2-11)	ALWMRLLPLL	105674	A*02:01			Mmr				n/a	D+	25992863	Davis MM
	2-11 (L2-11)	ALWMRLLPLL	105674	A*02:01					Pept-imm		n/a	D-	29967002	Boitard C
	*2-11 (L2-11)	ALWMRLLPLL	105674	A*02:01			ELISpot; Mmr		Pept-imm; clone	APC; proteasome	yes/no	A-	19011169, 21998398, 25992863, 29967002		4
	*2-11 (L2-11)	ALWMRLLPLL	105674	A24			ELISpot			Proteasome	n/a	B+	19011169	Boitard C	1
	*2-11 (L2-11)	ALWMRLLPLL	105674	B8			ELISpot			Proteasome	yes	B+	19011169	Boitard C	1
	3-11 (L3-11)	LWMRLLPLL	105950	A*24:02			Mmr	Clone		MS; APC	yes	A-	22522618	Peakman M
	3-11 (L3-11)	LWMRLLPLL	105950	A*24:02				Line			n/a	C-	30008714	Sewell AK
	*3-11 (L3-11)	LWMRLLPLL	105950	A*24:02			Mmr	Line; clone		MS; APC	yes	A-	22522618, 30008714		2
	4-13 (L4-13)	WMRLLPLLAL	106187	B7			Mmr			Proteasome	yes	B+	21636247	Roep BO
	4-13 (L4-13)	WMRLLPLLAL	106187	B7			Mmr				n/a	D+	23803704	Steinman L, Robinson WH
	*4-13 (L4-13)	WMRLLPLLAL	106187	B7			Mmr			Proteasome	yes	B+	21636247, 23803704		2
	6-14 (L6-14)	RLLPLLALL	103557	A*02:01			ELISpot				n/a	D+	17327428	Mallone R, van Endert P
	6-14 (L6-14)	RLLPLLALL	103557	A2			ELISpot	Line	Pept-imm; clone	APC; proteasome	yes	A-	19011169	Boitard C
	6-14 (L6-14)	RLLPLLALL	103557	A*02:01			Mmr				yes	D+	21998398	Boitard C
	6-14 (L6-14)	RLLPLLALL	103557	A*02:01			Mmr				n/a	D+	25992863	Davis MM
	6-14 (L6-14)	RLLPLLALL	103557	A*02:01			Mmr				no	D+	29429978	Mallone R
	6-14 (L6-14)	RLLPLLALL	103557	A*02:01					Pept-imm; polyIC-treat		n/a	D-	29967002	Boitard C
	6-14 (L6-14)	RLLPLLALL	103557	A*02:01			Mmr			MS	no	B+	30078552	Mallone R
	*6-14 (L6-14)	RLLPLLALL	103557	A*02:01			ELISpot; Mmr	Line	Pept-imm; clone; polyIC-treat	APC; proteasome; MS	yes/no	A-	17327428, 19011169, 21998398, 25992863, 29429978, 29967002, 30078552		7
	*6-16 (L6-16)	RLLPLLALLAL	115471	A2			ELISpot			Proteasome	yes	B+	19011169	Boitard C	1
	*8-16 (L8-16)	LPLLALLAL	105936	B*07:02			ELISpot; Mmr				no	D+	22997432	Mallone R	1
	*9-18 (L9-18)	PLLALLALWG	159293	A3			Mmr			Proteasome	no	B+	21636247	Roep BO	1
	*14-23 (L14-23)	LALWGPDPAA	115337	A2			ELISpot		Pept-imm; clone	APC; proteasome	yes	A-	19011169	Boitard C	1
	15-24 (L15-24)	ALWGPDPAAA	103041	A*02:01			ELISpot	Clone		MS; APC	yes	A-	18802479	Peakman M
	15-24 (L15-24)	ALWGPDPAAA	103041	A2			ELISpot		Pept-imm; clone	APC; proteasome	yes	A-	19011169	Boitard C
	15-24 (L15-24)	ALWGPDPAAA	103041	A2			Mmr				yes	D+	20357361	Roep BO
	15-24 (L15-24)	ALWGPDPAAA	103041	A*02:01			Mmr				yes	D+	21998398	Boitard C
	15-24 (L15-24)	ALWGPDPAAA	103041	A*02:01				Clone			n/a	C-	22102287	Sewell AK
	15-24 (L15-24)	ALWGPDPAAA	103041	A*02:01	Mmr						n/a	C	22213807	von Herrath MG
	15-24 (L15-24)	ALWGPDPAAA	103041	A*02:01				Clone			n/a	C-	22245737	Sewell AK
	15-24 (L15-24)	ALWGPDPAAA	103041	A*02:01				Clone			n/a	C-	23255554	Wooldridge L
	15-24 (L15-24)	ALWGPDPAAA	103041	A2			Mmr				n/a	D+	23803704	Steinman L, Robinson WH
	15-24 (L15-24)	ALWGPDPAAA	103041	A*02:01			Mmr				n/a	D+	24387802	von Herrath MG
	15-24 (L15-24)	ALWGPDPAAA	103041	A*02:01			Mmr				no	D+	25249579	Skowera A
	15-24 (L15-24)	ALWGPDPAAA	103041	A*02:01			Mmr				n/a	D+	25992863	Davis MM
	15-24 (L15-24)	ALWGPDPAAA	103041	A*02:01				Clone			n/a	C-	27183389	Sewell AK
	15-24 (L15-24)	ALWGPDPAAA	103041	A*02:01			Mmr				n/a	D+	28794283	Peakman M
	15-24 (L15-24)	ALWGPDPAAA	103041	A*02:01			Mmr				no	D+	29196783	James EA, multicenter
	15-24 (L15-24)	ALWGPDPAAA	103041	A*02:01			Mmr				yes	D+	29429978	Mallone R
	15-24 (L15-24)	ALWGPDPAAA	103041	A*02:01			Mmr				n/a	D+	29483360	Sewell AK
	15-24 (L15-24)	ALWGPDPAAA	103041	A*02:01					PolyIC-treat		n/a	D-	29967002	Boitard C
	15-24 (L15-24)	ALWGPDPAAA	103041	A*02:01				Line; clone		APC	n/a	A-	30008714	Sewell AK
	15-24 (L15-24)	ALWGPDPAAA	103041	A2			Mmr				n/a	D+	30089176	Roep BO
	15-24 (L15-24)	ALWGPDPAAA	103041	A*02:01			Mmr				n/a	D+	30428974	James EA
	*15-24 (L15-24)	ALWGPDPAAA	103041	A*02:01	Mmr		ELISpot; Mmr	Clone; line	Pept-imm; clone; polyIC-treat	MS; APC; proteasome	yes/no	A+	18802479, 19011169, 20357361, 21998398, 22102287, 22213807, 22245737, 23255554, 23803704, 24387802, 25249579, 25992863, 27183389, 28794283, 29196783, 29429978, 29483360, 29967002, 30008714, 30089176, 30428974		21
	*15-25 (L15-B1)	ALWGPDPAAAF	115182	A1			ELISpot			Proteasome	n/a	B+	19011169	Boitard C	1
	*15-25 (L15-B1)	ALWGPDPAAAF	115182	A24			ELISpot			Proteasome	n/a	B+	19011169	Boitard C	1
	*17-24 (L17-24)	WGPDPAAA	103728	A*02:01			ELISpot			MS	no	B+	18802479	Peakman M	1
	29-38 (B5-14)	HLCGSHLVEA	102515	A*02:01					Spont		n/a	D-	17620420	DiLorenzo TP
	29-38 (B5-14)	HLCGSHLVEA	102515	A*02:01			ELISpot		Spont		n/a	D+	18390725	van Endert P
	29-38 (B5-14)	HLCGSHLVEA	102515	A2			Mmr			Proteasome	yes	B+	21636247	Roep BO
	*29-38 (B5-14)	HLCGSHLVEA	102515	A*02:01			ELISpot; Mmr		Spont	Proteasome	yes	B+	17620420, 18390725, 21636247		3
	*30-39 (B6-15)	LCGSHLVEAL	106593	A*02:01			Mmr				no	D+	21998398	Boitard C	1
	33-42 (B9-18)	SHLVEALYLV	104248	A*02:01					Pept-imm; line	APC; proteasome	n/a	B	15983206	van Endert P
	33-42 (B9-18)	SHLVEALYLV	104248	A*02:01			Mmr				yes	D+	21998398	Boitard C
	33-42 (B9-18)	SHLVEALYLV	104248	A*02:01					Pept-imm		n/a	D-	29967002	Boitard C
	*33-42 (B9-18)	SHLVEALYLV	104248	A*02:01			Mmr		Pept-imm; line	APC; proteasome	yes	A-	15983206, 21998398, 29967002		3
	34-42 (B10-18)	HLVEALYLV	100920	A*02:01					Pept-imm; line	APC; proteasome	n/a	B	15983206	van Endert P
	34-42 (B10-18)	HLVEALYLV	100920	A2			ELISpot			Proteasome	yes	B+	16030147	Boitard C
	34-42 (B10-18)	HLVEALYLV	100920	A*02:01			Mmr	Line		Proteasome	n/a	A-	16339897	Roep BO
	34-42 (B10-18)	HLVEALYLV	100920	A*02:01			ELISpot				n/a	D+	17065344	Tan R
	34-42 (B10-18)	HLVEALYLV	100920	A*02:01			ELISpot				n/a	D+	17327428	Mallone R, van Endert P
	34-42 (B10-18)	HLVEALYLV	100920	A*02:01			ELISpot				n/a	D+	18305140	Mallone R, van Endert P
	34-42 (B10-18)	HLVEALYLV	100920	A*02:01					Spont		n/a	D-	18390725	van Endert P
	34-42 (B10-18)	HLVEALYLV	100920	A*02:01			Mmr				n/a	D+	19837003	Herold KC
	34-42 (B10-18)	HLVEALYLV	100920	A2			Mmr				yes	D+	20357361	Roep BO
	34-42 (B10-18)	HLVEALYLV	100920	A*02:01			Mmr				no	D+	21998398	Boitard C
	34-42 (B10-18)	HLVEALYLV	100920	A*02:01			ELISpot; Mmr				n/a	D+	22069251	Mallone R, Wong FS, multicenter
	34-42 (B10-18)	HLVEALYLV	100920	A*02:01	Mmr						n/a	C	22213807	von Herrath MG
	34-42 (B10-18)	HLVEALYLV	100920	A*02:01			ELISpot				n/a	D+	22260783	Yang T
	34-42 (B10-18)	HLVEALYLV	100920	A2			Mmr				n/a	D+	23803704	Steinman B, Robinson WH
	34-42 (B10-18)	HLVEALYLV	100920	A*02:01			Mmr				n/a	D+	24387802	von Herrath MG
	34-42 (B10-18)	HLVEALYLV	100920	A*02:01			Mmr				no	D+	25249579	Skowera A
	34-42 (B10-18)	HLVEALYLV	100920	A*02:01				Clone			n/a	C-	26826277	Sewell AK
	34-42 (B10-18)	HLVEALYLV	100920	A*02:01			Mmr				n/a	D+	28794283	Peakman M
	34-42 (B10-18)	HLVEALYLV	100920	A*02:01			Mmr				yes	D+	29196783	James EA, multicenter
	34-42 (B10-18)	HLVEALYLV	100920	A*02:01			Mmr				n/a	D+	29506985	Monti P
	34-42 (B10-18)	HLVEALYLV	100920	A*02:01				Line			n/a	C-	30008714	Sewell AK
	34-42 (B10-18)	HLVEALYLV	100920	A*02:01			Mmr				n/a	D+	30428974	James EA
	*34-42 (B10-18)	HLVEALYLV	100920	A*02:01	Mmr		ELISpot; Mmr	Line; clone	Pept-imm; line; spont	APC; proteasome	yes/no	A+	15983206, 16030147, 16339897, 17065344, 17327428, 18305140, 18390725, 19837003, 20357361, 21998398, 22069251, 22213807, 22260783, 23803704, 24387802, 25249579, 26826277, 28794283, 29196783, 29506985, 30008714, 30428974		22
	*38-46 (B14-22)	ALYLVCGER	103803	A3			ELISpot			Proteasome	n/a	B+	16030147	Boitard C	1
	*38-46 (B14-22)	ALYLVCGER	103803	A11			ELISpot			Proteasome	n/a	B+	16030147	Boitard C	1
	*39-47 (B15-23)	LYLVCGERG	102639	A*24:02				Line			n/a	C-	11269889	Kawamura T	1
	*39-48 (B15-24)	LYLVCGERGF	106637	A24			ELISpot			Proteasome	n/a	B+	16030147	Boitard C	1
	*41-50 (B17-26)	LVCGERGFFY	106631	A1			ELISpot			Proteasome	yes	B+	16030147	Boitard C	1
	*41-50 (B17-26)	LVCGERGFFY	106631	A3			ELISpot			Proteasome	n/a	B+	16030147	Boitard C	1
	*41-50 (B17-26)	LVCGERGFFY	106631	A11			ELISpot			Proteasome	n/a	B+	16030147	Boitard C	1
	*42-51 (B18-27)	VCGERGFFYT	102877	A1			ELISpot			Proteasome	n/a	B+	16030147	Boitard C	1
	42-51 (B18-27)	VCGERGFFYT	102877	A2			ELISpot			Proteasome	yes	B+	16030147	Boitard C
	42-51 (B18-27)	VCGERGFFYT	102877	A*02:01			ELISpot				n/a	D+	17327428	Mallone R, van Endert P
	42-51 (B18-27)	VCGERGFFYT	102877	A*02:01			ELISpot				n/a	D+	18305140	Mallone R, van Endert P
	42-51 (B18-27)	VCGERGFFYT	102877	A*02:01					Spont		n/a	D-	18390725	van Endert P
	42-51 (B18-27)	VCGERGFFYT	102877	A*02:01			Mmr				no	D+	21998398	Boitard C
	*42-51 (B18-27)	VCGERGFFYT	102877	A*02:01			ELISpot; Mmr		Spont	Proteasome	yes/no	B+	16030147, 17327428, 18305140, 18390725, 21998398		5
	*42-51 (B18-27)	VCGERGFFYT	102877	B8			ELISpot			Proteasome	yes	B+	16030147	Boitard C	1
	*42-51 (B18-27)	VCGERGFFYT	102877	B18			ELISpot			Proteasome	n/a	B+	16030147	Boitard C	1
	*44-51 (B20-27)	GERGFFYT	105816	A1			ELISpot			Proteasome	n/a	B+	16030147	Boitard C	1
	*44-51 (B20-27)	GERGFFYT	105816	B8			ELISpot			Proteasome	yes	B+	16030147	Boitard C	1
	*45-53 (B21-29)	ERGFFYTPK	106399	A3			ELISpot			Proteasome	n/a	B+	16030147	Boitard C	1
	*49-57 (B25-C1)	FYTPKTRRE	105799	B8			ELISpot			Proteasome	yes	B+	16030147	Boitard C	1
	*51-61 (B27-C5)	TPKTRREAEDL	106918	B8			ELISpot			Proteasome	no	B+	16030147	Boitard C	1
	76-84 (C20-28)	SLQPLALEG	101242	A*02:01					Pept-imm; line	APC; proteasome	n/a	B	15983206	van Endert P
	76-84 (C20-28)	SLQPLALEG	101242	A*02:01			ELISpot				n/a	D+	17327428	Mallone R, van Endert P
	*76-84 (C20-28)	SLQPLALEG	101242	A*02:01			ELISpot		Pept-imm; line	APC; proteasome	n/a	A-	15983206, 17327428		2
	76-84 (C20-28)	SLQPLALEG	101242	A3			Mmr			Proteasome	yes	B+	21636247	Roep BO
	76-84 (C20-28)	SLQPLALEG	101242	A3			Mmr				n/a	D+	23803704	Steinman C, Robinson WH
	*76-84 (C20-28)	SLQPLALEG	101242	A3			Mmr			Proteasome	yes	B+	21636247, 23803704		2
	79-88 (C23-32)	PLALEGSLQK	159292	A3			Mmr			Proteasome	yes	B+	21636247	Roep BO
	79-88 (C23-32)	PLALEGSLQK	159292	A3			Mmr				n/a	D+	23803704	Steinman C, Robinson WH
	*79-88 (C23-32)	PLALEGSLQK	159292	A3			Mmr			Proteasome	yes	B+	21636247, 23803704		2
	*81-89 (C25-33)	ALEGSLQKR	104727	A*02:01					Pept-imm; line	Proteasome	n/a	B	15983206	van Endert P	1
	85-94 (C29-A5)	SLQKRGIVEQ	101241	A*02:01					Pept-imm; line	APC; proteasome	n/a	B	15983206	van Endert P
	85-94 (C29-A5)	SLQKRGIVEQ	101241	A*02:01			ELISpot				n/a	D+	17327428	Mallone R, van Endert P
	85-94 (C29-A5)	SLQKRGIVEQ	101241	A*02:01			Mmr				n/a	D+	25992863	Davis MM
	*85-94 (C29-A5)	SLQKRGIVEQ	101241	A*02:01			ELISpot; Mmr		Pept-imm; line	APC; proteasome	n/a	A-	15983206, 17327428, 25992863		3
	90-99 (A1-10)	GIVEQCCTSI	100882	A*02:01					Pept-imm; line	APC; proteasome	n/a	B	15983206	van Endert P
	90-99 (A1-10)	GIVEQCCTSI	100882	A*02:01					Spont		n/a	D-	18390725	van Endert P
	90-99 (A1-10)	GIVEQCCTSI	100882	A*02:01			Mmr				n/a	D+	19837003	Herold KC
	*90-99 (A1-10)	GIVEQCCTSI	100882	A*02:01			Mmr		Pept-imm; line; spont	APC; proteasome	n/a	A-	15983206, 18390725, 19837003		3
	101-109 (A12-20)	SLYQLENYC	101248	A*02:01					Pept-imm; line	APC	n/a	B	15983206	van Endert P
	101-109 (A12-20)	SLYQLENYC	101248	A*02:01			ELISpot				n/a	D+	17327428	Mallone R, van Endert P
	101-109 (A12-20)	SLYQLENYC	101248	A*02:01			ELISpot				n/a	D+	18305140	Mallone R, van Endert P
	101-109 (A12-20)	SLYQLENYC	101248	A*02:01					Spont		n/a	D-	18390725	van Endert P
	101-109 (A12-20)	SLYQLENYC	101248	A*02:01			Mmr				n/a	D+	19837003	Herold KC
	101-109 (A12-20)	SLYQLENYC	101248	A*02:01			Mmr				no	D+	21998398	Boitard C
	101-109 (A12-20)	SLYQLENYC	101248	A*02:01			ELISpot; Mmr				n/a	D+	22069251	Mallone R, Wong FS, multicenter
	101-109 (A12-20)	SLYQLENYC	101248	A*02:01					Pept-imm		n/a	D-	29967002	Boitard C
	*101-109 (A12-20)	SLYQLENYC	101248	A*02:01			ELISpot; Mmr		Pept-imm; line; spont	APC	no	A-	15983206, 17327428, 18305140, 18390725, 19837003, 21998398, 22069251, 29967002		8
ISL-1	*276-284	GLQANPVEV	952138	A*02:01	Mmr		Mmr			MS	yes (islets);	A	30078552	Mallone R	1
(ISL1)											no (blood)
KCNK16	*129-137	ALLGIPLNV	952014	A*02:01			Mmr			MS	n/a	B+	30078552	Mallone R	1
(KCNK16)
KIF1A	*1347-1355	VLDTSVAYV	779283	A*02:01			Mmr			MS	n/a	B+	30078552	Mallone R	1
(KIF1A)
PC2	*30-38	FTNHFLVEL	952113	A*02:01			Mmr			MS	no	B+	30078552	Mallone R	1
(PCSK2)
S100b	*10-18	ALIDVFHQY	562065	A*02:01			ELISpot		Spont	Proteasome	yes	B+	30817223	Calvino RV	1
(S100B)	*20-28	GREGDKHKL	910732	A*02:01			ELISpot		Spont	Proteasome	yes	B+	30817223	Calvino RV	1
SCG5	*186-195	YLQGQRLDNV	952620	A*02:01			Mmr			MS	no	B+	30078552	Mallone R	1
(SCG5)
UCN3	*1-9	MLMPVHFLL	952274	A*02:01	Mmr		Mmr			MS	yes (islets);	A	30078552	Mallone R	1
(UCN3)											no (blood)
VTDB	*211-219	LLTTLSNRV	767640	A*02:01			ELISpot		Pept-imm → diabetes		yes	D+	29549963	Li S	1
(GC)	*235-243	NLIKLAQV	767652	A*02:01			ELISpot		Pept-imm → diabetes		yes	D+	29549963	Li S	1
ZnT8	*16-24	KMYAFTLES	171844	A*02:01			ELISpot		DNA-imm	DNA-mouse	n/a	B+	22526607	Mallone R	1
(SLC30A8)	*16-25	KMYAFTLESV	504008	A*02:01			ELISpot				no	D+	26541133	Zhang M	1
	*93-101	HIAGSLAVV	168764	A2			ELISpot		DNA-imm	DNA-mouse	n/a	B+	22586580	van Endert P	1
	107-115	LLIDLTSFL	169149	A*02:01					Line; pept-imm → diabetes		n/a	D	23246542	Li S, Yang Z
	107-115	LLIDLTSFL	169149	A*02:01			ELISpot				yes	D+	26541133	Zhang M
	107-115	LLIDLTSFL	169149	A*02:01					Pept-imm → diabetes		n/a	D-	27832962	Li S
	*107-115	LLIDLTSFL	169149	A*02:01			ELISpot		Line; pept-imm → diabetes		yes	C-	23246542, 26541133, 27832962		3
	107-116	LLIDLTSFLL	504015	A*02:01			ELISpot		DNA-imm; pept-imm	DNA-mouse	yes	B+	26541133	Zhang M
	107-116	LLIDLTSFLL	504015	A*02:01			ELISpot		Pept-imm		n/a	D+	28887632	Yang T
	*107-116	LLIDLTSFLL	504015	A*02:01			ELISpot		DNA-imm; pept-imm	DNA-mouse	yes	B+	26541133, 28887632		2
	*110-118	DLTSFLLSL	168356	A*02:01			ELISpot				yes	D+	26541133	Zhang M	1
	114-123	FLLSLFSLWL	168578	A2			ELISpot		DNA-imm	DNA-mouse	yes	B+	22586580	van Endert P
	114-123	FLLSLFSLWL	168578	A*02:01			ELISpot				no	D+	26541133	Zhang M
	*114-123	FLLSLFSLWL	168578	A*02:01			ELISpot		DNA-imm	DNA-mouse	yes/no	B+	22586580, 26541133		2
	115-123	LLSLFSLWL	172188	A*02:01					Line; pept-imm → diabetes		n/a	D	23246542	Li S, Yang Z
	115-123	LLSLFSLWL	172188	A*02:01			ELISpot		DNA-imm; pept-imm	DNA-mouse	yes	B+	26541133	Zhang M
	115-123	LLSLFSLWL	172188	A*02:01			ELISpot		Pept-imm		n/a	D+	28887632	Yang T
	*115-123	LLSLFSLWL	172188	A*02:01			ELISpot		DNA-imm; pept-imm; line; pept-imm → diabetes	DNA-mouse	yes	A-	23246542, 26541133, 28887632		3
	*140-148	EILGALLSI	168356	A*02:01			ELISpot				no	D+	26541133	Zhang M	1
	*141-149	ILGALLSIL	168867	A*02:01			ELISpot				no	D+	26541133	Zhang M	1
	*145-153	LLSILCIWV	172186	A*02:01					Line; pept-imm → diabetes		n/a	D	23246542	Li S, Yang Z	1
	153-161	VVTGVLVYL	170038	A*02:01			ELISpot				n/a	D+	22260783	Yang T
	153-161	VVTGVLVYL	170038	A*02:01			ELISpot		DNA-imm	DNA-mouse	n/a	B+	22526607	Mallone R
	153-161	VVTGVLVYL	170038	A2			ELISpot		DNA-imm	DNA-mouse	n/a	B+	22586580	van Endert P
	153-161	VVTGVLVYL	170038	A*02:01			ELISpot		DNA-imm; pept-imm	DNA-mouse	yes	B+	26541133	Zhang M
	153-161	VVTGVLVYL	170038	A*02:01			ELISpot		Pept-imm		n/a	D+	28887632	Yang T
	*153-161	VVTGVLVYL	170038	A*02:01			ELISpot		DNA-imm; pept-imm	DNA-mouse	yes	B+	22260783, 22526607, 22586580, 26541133, 28887632		5
	165-173	RLLYPDYQI	173061	A*02:01			ELISpot		DNA-imm	DNA-mouse	n/a	B+	22526607	Mallone R
	165-173	RLLYPDYQI	173061	A*02:01			ELISpot				no	D+	26541133	Zhang M
	*165-173	RLLYPDYQI	173061	A*02:01			ELISpot		DNA-imm	DNA-mouse	no	B+	22526607, 26541133		2
	*173-181	IQATVMIIV	171556	A*02:01			ELISpot		DNA-imm	DNA-mouse	n/a	B+	22526607	Mallone R	1
	*177-186	VMIIVSSLAV	504065	A*02:01			ELISpot		DNA-imm	DNA-mouse	yes	B+	26541133	Zhang M	1
	185-194	AVAANIVLTV	168235	A2			ELISpot		DNA-imm	DNA-mouse	yes	B+	22586580	van Endert P
	185-194	AVAANIVLTV	168235	A*02:01				Clone			n/a	C-	29429978	Mallone R
	*185-194	AVAANIVLTV	168235	A*02:01			ELISpot	Clone	DNA-imm	DNA-mouse	yes	A-	22586580, 29429978		2
	186-194	VAANIVLTV	173562	A*02:01			ELISpot		DNA-imm	DNA-mouse	yes	B+	22526607	Mallone R
	186-194	VAANIVLTV	173562	A*02:01	Mmr		Mmr; ELISpot	Clone		APC	no (Mmr blood);	A+	29429978	Mallone R
											yes (Mmr islets; ELISpot)
	186-194	VAANIVLTV	173562	A*02:01	Mmr						yes	C	30078552	Mallone R
	186-194	VAANIVLTV	173562	A*02:01			Mmr				n/a	D+	30428974	James EA
	*186-194	VAANIVLTV	173562	A*02:01	Mmr		ELISpot; Mmr	Clone	DNA-imm	DNA-mouse; APC	yes/no	A+	22526607, 29429978, 30078552, 30428974		4
	*200-208	CLGHNHKEV	503971	A*02:01			ELISpot				no	D+	26541133	Zhang M	1
	221-229	ALGDLFQSI	168159	A*02:01					DNA-imm	DNA-mouse	n/a	B-	22526607	Mallone R
	221-229	ALGDLFQSI	168159	A2			ELISpot		DNA-imm	DNA-mouse	n/a	B+	22586580	van Endert P
	221-229	ALGDLFQSI	168159	A*02:01			ELISpot				no	D+	26541133	Zhang M
	*221-229	ALGDLFQSI	168159	A*02:01			ELISpot		DNA-imm	DNA-mouse	no	B+	22526607, 22586580, 26541133		3
	*228-236	SISVLISAL	169725	A2			ELISpot		DNA-imm	DNA-mouse	yes	B+	22586580	van Endert P	1
	*245-254	KIADPICTFI	504005	A*02:01			ELISpot				no	D+	26541133	Zhang M	1
	*253-261	FIFSILVLA	171037	A*02:01			ELISpot		DNA-imm	DNA-mouse	n/a	B+	22526607	Mallone R	1
	*253-261	FIF(S→pS)ILVLA	437274	A2				Line			n/a	C-	26370701	James EA	1
	*257-266	ILVLASTITI	168881	A2			ELISpot		DNA-imm	DNA-mouse	n/a	B+	22586580	van Endert P	1
	266-274	ILKDFSILL	168874	A*02:01			ELISpot		DNA-imm	DNA-mouse	n/a	B+	22526607	Mallone R
	266-274	ILKDFSILL	168874	A2			ELISpot		DNA-imm	DNA-mouse	n/a	B+	22586580	van Endert P
	*266-274	ILKDFSILL	168874	A*02:01			ELISpot		DNA-imm	DNA-mouse	n/a	B+	22526607, 22586580		2
	*273-282	LLMEGVPKSL	169153	A*02:01			ELISpot				no	D+	26541133	Zhang M	1
	*280-288	KSLNYSGVK	171933	A*02:01			ELISpot		DNA-imm	DNA-mouse	n/a	B+	22526607	Mallone R	1
	*281-290	SLNYSGVKEL	169744	A*02:01			ELISpot				no	D+	26541133	Zhang M	1
	291-300	ILAVDGVLSV	168865	A2			ELISpot		DNA-imm	DNA-mouse	yes	B+	22586580	van Endert P
	291-300	ILAVDGVLSV	168865	A*02:01			ELISpot				yes	D+	26541133	Zhang M
	*291-300	ILAVDGVLSV	168865	A*02:01			ELISpot		DNA-imm	DNA-mouse	yes	B+	22586580, 26541133		2
	*292-300	LAVDGVLSV	172015	A*02:01			ELISpot				no	D+	26541133	Zhang M	1
	*299-308	SVHSLHIWSL	169790	A*02:01			ELISpot				no	D+	26541133	Zhang M	1
	*314-322	ILSAHVATA	168880	A*02:01			ELISpot				no	D+	26541133	Zhang M	1
	*343-351	TMHSLTIQM	173491	A*02:01			ELISpot		DNA-imm	DNA-mouse	n/a	B+	22526607	Mallone R	1
Non-conventional epitopes (excluding post-translational modifications, which are included above)
Epitope	Position	Sequence	IEDB #1	MHC	Human islets, pLNs		Human blood, spleen		HLA-Tg mouse4	NPP5	Ex vivo type 1	Evidence	Refs7	Corresponding Author	Reporting
source8					Ex vivo2	Other3	Ex vivo2	Other3			diabetes > controls				Articles
CCNI-008	*14-22	KLNWDLHTA	952207	A*02:01			Mmr				no	D+	30078552	Mallone R	1
GAD2-003	*179-187	KIIKLFFRL	952200	A*02:01			Mmr				no	D+	30078552	Mallone R	1
GNAS-036	*67-75	YMCTHRLLL	952623	A*02:01			Mmr				no	D+	30078552	Mallone R	1
	*124-132	AMSNLVPPV	952026	A*02:01			Mmr				no	D+	30078552	Mallone R	1
IAPP-002	*33-42	VLSRNILLEL	952582	A*02:01			Mmr				no	D+	30078552	Mallone R	1
IAPP hybrid	*15-17/5-10	VALKLQVFL	952568	A*02:01	Mmr		Mmr			MS	yes (islets);	A	30078552	Mallone R	1
											no (blood)
INS-DRiP	1-9	MLYQHLLPL	606356	A*02:01			Mmr	Clone			yes	C-	28263308	Roep BO
	1-9	MLYQHLLPL	606356	A2			Mmr				n/a	D+	30089176	Roep BO
	*1-9	MLYQHLLPL	606356	A*02:01			Mmr	Clone			yes	C-	28263308, 30089176		2
PTPRN-021	*392-402	SLAAGVKLLEI	952381	A*02:01			Mmr				n/a	D+	30078552	Mallone R	1
	*398-407	KLLEILAEHV	952204	A*02:01			Mmr				n/a	D+	30078552	Mallone R	1
PTPRN2-005	*11-19	LLLLPPRV	101025	A*02:01			Mmr				no	D+	30078552	Mallone R	1
	*19-27	VLPAAPSSV	952581	A*02:01			Mmr				n/a	D+	30078552	Mallone R	1
REXO2-020	*2-10	SVANALWIV	952401	A*02:01			Mmr				n/a	D+	30078552	Mallone R	1
SCG5-009	*186-194	FLSGAVNRL	952103	A*02:01	Mmr		Mmr			MS	no (blood);	A	30078552	Mallone R	1
											n/a (islets)
SLC30A8-002	*16-25	KMYAFTLESV	504008	A*02:01			Mmr				no	D+	30078552	Mallone R	1
In cases where an epitope is reported in more than one paper, the entries are in gray font and are followed by a summary line in bold with the epitope position preceded by an asterisk.
Epitopes reported in one paper only are also in bold with the epitope position preceded by an asterisk.
1 Immune Epitope Data Base number, www.iedb.org
2 The type of assay performed is indicated, e.g., ELISpot, HLA multimer (Mmr).
3 T cell clone or line, or TCR-transduced T cell line (TCR).
4 Epitope-reactive T cells observed spontaneously (spont) or in DNA-immunized (DNA-imm) or peptide-immunized (pept-imm) or polyIC-treated (polyIC-treat) HLA-Tg mice.
Instances where peptide-immunization induced diabetes are noted (pept-imm → diabetes).
5 NPP, natural processing/presentation: peptide elution and identification by mass spectrometry (MS); response to antigen protein/antigen-expressing cells (APC); DNA immunization response in HLA-Tg mice (DNA-mouse);
in vitro proteasome digestion yielded the correct C-terminus (proteasome).
6 Yes, the indicated ex vivo frequency difference between type 1 diabetes patients and controls is statistically supported; no, patients are not statistically greater than controls; n/a, no statistics are provided or only one group
was examined or ex vivo human data are not reported; yes/no reflects multiple studies with different findings.
7 PubMed identifier (PMID) for each reference is indicated.
8 DRiP, defective ribosomal product; gene names followed by a hyphen and three numbers refer to splice variants derived from the indicated genes.
